# Supplementary material
Source: publisher figshare collection journal article supplement (https://karger.figshare.com/ndownloader/files/8704816)
Supplement: Supplementary file 1 [file 8704816]

## Appendix

| Medical resource                         | Unit cost in Brazil <sup>1</sup><br>(2007 BRL) | Unit cost in the USA <sup>2</sup><br>(2007 USD) |
|------------------------------------------|------------------------------------------------|-------------------------------------------------|
| Diagnosis reimbursement                  |                                                |                                                 |
| IS – surgical                            | 1,567                                          | 1,120                                           |
| IS – medical                             | 390                                            | 278                                             |
| ICH – surgical                           | 2,174                                          | 1,553                                           |
| ICH – medical                            | 390                                            | 278                                             |
| Room and board                           |                                                |                                                 |
| Emergency room (ER) <sup>3</sup>         | 7.55 (if stay <48 h)                           | 5.39 (if stay <48 h)                            |
| Intensive care unit (ICU)                | 213.71 (per day)                               | 165.51 (per day)                                |
| General ward (GW)                        | 13.28 (per additional day<br>after 7 days)     | 9.49 (per additional day<br>after 7 days)       |
| Stroke unit (SU)                         | <sup>6</sup>                                   | <sup>6</sup>                                    |
| Surgical interventions <sup>4</sup>      |                                                |                                                 |
| Imaging and radiology exams <sup>5</sup> |                                                |                                                 |
| CT scan                                  | 173.50                                         | 123.93                                          |
| MRI                                      | 268.75                                         | 191.96                                          |
| Echocardiography                         | 102.00                                         | 72.86                                           |
| Digital angiography                      | 179.46                                         | 128.19                                          |
| Carotid echo Doppler                     | 30.77                                          | 21.98                                           |
| Chest X-ray                              | included                                       |                                                 |
| Abdominal ultrasound                     | included                                       |                                                 |
| Abdominal X-ray                          | included                                       |                                                 |
| Transcranial Doppler                     | 90.00                                          | 64.29                                           |
| Renal ultrasound                         | included                                       |                                                 |
| Doppler of the upper extremities         | 179.46                                         | 128.19                                          |
| Doppler of the lower extremities         | 179.46                                         | 128.19                                          |
| Lumbar puncture                          | included                                       |                                                 |
| Other area X-ray                         | included                                       |                                                 |
| Support                                  |                                                |                                                 |
| Foley                                    | included                                       |                                                 |
| Other urinary support                    | included                                       |                                                 |
| Nasogastric intubation/enteral nutrition | 40.00 (plus 30.00 for<br>each additional day)  | 28.57 (plus 21.43 for<br>each additional day)   |
| Parenteral nutrition                     | 60.00 (per day)                                | 42.86 (per day)                                 |
| Swan-Ganz catheter                       | 121.61 (installation and<br>use)               | 86.86 (installation and<br>use)                 |
| Central venous catheter                  | 115.00 (installation and<br>use)               | 82.14 (installation and<br>use)                 |

|                                    |              |
|------------------------------------|--------------|
| Mechanical ventilation             | included     |
| Hydration                          | included     |
| Catheter for peripheral line       | included     |
| Endotracheal intubation            | included     |
| Oxygen catheter/mask               | included     |
| Laboratory tests                   | all included |
| Physical exams                     | all included |
| Evaluation by health professionals | all included |

<sup>1</sup> Unit costs in Brazil are based on the SUS reimbursement rates (Brazil's Unified Health System).

<sup>2</sup> Costs were converted to USD based on the 2005 purchasing power parity index (1.4 BRL = 1 USD). Since there are no 2007 purchasing power parity data available, we assume that the 2005 rate has remained constant.

<sup>3</sup> Patient is charged the ER cost if ER LOS <48 h and the patient is not transferred to another setting (i.e. discharged from or died in ER); patient is charged package cost (and no ER cost) if ER LOS <2 days before transfer to another setting, or if ER LOS >2 days.

<sup>4</sup> Patient is charged the surgical package cost if the patient underwent any surgical procedure.

<sup>5</sup> Cost is per exam.

<sup>6</sup> Stroke unit costs are not available.
